# Supplementary material for: A Study to Identify Medication-Related Problems and Associated Cost Avoidance by Community Pharmacists during a Comprehensive Medication Review in Patients One Week Post Hospitalization
Source: MDPI journal article supplement (doi:10.3390/pharmacy7020051), 2019-05-29
Supplement: s1 [file s1]

# EncounterWorksheet

| PRESCRIPTION INFORMATION  |  |  |  |         |  |               |  |     |  |  |  |                      |  |                 |  |  |  |             |  |  |  |  |  |
|---------------------------|--|--|--|---------|--|---------------|--|-----|--|--|--|----------------------|--|-----------------|--|--|--|-------------|--|--|--|--|--|
| Patient Info/Rx Info      |  |  |  |         |  |               |  |     |  |  |  |                      |  |                 |  |  |  |             |  |  |  |  |  |
| Patient ID Number         |  |  |  |         |  |               |  |     |  |  |  | Gender               |  | Date of Birth   |  |  |  |             |  |  |  |  |  |
|                           |  |  |  |         |  |               |  |     |  |  |  | M F                  |  | Y Y Y Y M M D D |  |  |  |             |  |  |  |  |  |
| Patient Last Name         |  |  |  |         |  |               |  |     |  |  |  |                      |  |                 |  |  |  |             |  |  |  |  |  |
|                           |  |  |  |         |  |               |  |     |  |  |  |                      |  |                 |  |  |  |             |  |  |  |  |  |
| Patient First Name        |  |  |  |         |  |               |  |     |  |  |  |                      |  |                 |  |  |  |             |  |  |  |  |  |
|                           |  |  |  |         |  |               |  |     |  |  |  |                      |  |                 |  |  |  |             |  |  |  |  |  |
| New Medication            |  |  |  |         |  |               |  |     |  |  |  |                      |  |                 |  |  |  |             |  |  |  |  |  |
| New Rx Date               |  |  |  |         |  | New Rx Number |  |     |  |  |  | Metric Qty.          |  |                 |  |  |  | Days Supply |  |  |  |  |  |
| M M D D Y Y Y Y           |  |  |  |         |  |               |  |     |  |  |  |                      |  |                 |  |  |  |             |  |  |  |  |  |
| New Rx National Drug Code |  |  |  |         |  |               |  |     |  |  |  | New Rx Prescriber ID |  |                 |  |  |  |             |  |  |  |  |  |
| Labeler                   |  |  |  | Product |  |               |  | Pkg |  |  |  |                      |  |                 |  |  |  |             |  |  |  |  |  |
|                           |  |  |  |         |  |               |  |     |  |  |  |                      |  |                 |  |  |  |             |  |  |  |  |  |

| MONITORING                         |  |  |  |         |  |                   |  |     |  |  |  |                          |  |  |  |  |  |             |  |  |  |  |  |
|------------------------------------|--|--|--|---------|--|-------------------|--|-----|--|--|--|--------------------------|--|--|--|--|--|-------------|--|--|--|--|--|
| Attempts                           |  |  |  |         |  |                   |  |     |  |  |  | Appointment              |  |  |  |  |  |             |  |  |  |  |  |
| 1 ____/____/____ @ ____:____ AM/PM |  |  |  |         |  |                   |  |     |  |  |  | ____/____/____           |  |  |  |  |  |             |  |  |  |  |  |
| 2 ____/____/____ @ ____:____ AM/PM |  |  |  |         |  |                   |  |     |  |  |  | ____:____ AM / PM        |  |  |  |  |  |             |  |  |  |  |  |
| 3 ____/____/____ @ ____:____ AM/PM |  |  |  |         |  |                   |  |     |  |  |  | (____) ____ - ____       |  |  |  |  |  |             |  |  |  |  |  |
| Current Medication                 |  |  |  |         |  |                   |  |     |  |  |  |                          |  |  |  |  |  |             |  |  |  |  |  |
| Current Rx Date                    |  |  |  |         |  | Current Rx Number |  |     |  |  |  | Metric Qty.              |  |  |  |  |  | Days Supply |  |  |  |  |  |
| M M D D Y Y Y Y                    |  |  |  |         |  |                   |  |     |  |  |  |                          |  |  |  |  |  |             |  |  |  |  |  |
| Current Rx National Drug Code      |  |  |  |         |  |                   |  |     |  |  |  | Current Rx Prescriber ID |  |  |  |  |  |             |  |  |  |  |  |
| Labeler                            |  |  |  | Product |  |                   |  | Pkg |  |  |  |                          |  |  |  |  |  |             |  |  |  |  |  |
|                                    |  |  |  |         |  |                   |  |     |  |  |  |                          |  |  |  |  |  |             |  |  |  |  |  |

| ENCOUNTER DOCUMENTATION |  |  |  |  |  |  |  |  |  |  |  | Date of Encounter/Follow-up |  |  |  |  |  |  |  |  |  |  |  | Claim Number |  |  |  |  |  |  |  |  |  |  |  |
|-------------------------|--|--|--|--|--|--|--|--|--|--|--|-----------------------------|--|--|--|--|--|--|--|--|--|--|--|--------------|--|--|--|--|--|--|--|--|--|--|--|
|-------------------------|--|--|--|--|--|--|--|--|--|--|--|-----------------------------|--|--|--|--|--|--|--|--|--|--|--|--------------|--|--|--|--|--|--|--|--|--|--|--|

| I. Indication For Service (REASON)    |  |     |  | II. Service Provided (ACTION)                                                                                                                                                                                                                                                                                                                                                                |  |     |  | III. Outcome of Service (RESULT)          |  |     |  |
|---------------------------------------|--|-----|--|----------------------------------------------------------------------------------------------------------------------------------------------------------------------------------------------------------------------------------------------------------------------------------------------------------------------------------------------------------------------------------------------|--|-----|--|-------------------------------------------|--|-----|--|
| CMR - Complex Drug Therapy            |  | 100 |  | Comprehensive Med Review (CMR)                                                                                                                                                                                                                                                                                                                                                               |  | 200 |  | CMR - Drug Therapy Problems Identified    |  | 300 |  |
|                                       |  |     |  |                                                                                                                                                                                                                                                                                                                                                                                              |  |     |  | CMR - No Drug Therapy Problems Identified |  | 301 |  |
|                                       |  |     |  |                                                                                                                                                                                                                                                                                                                                                                                              |  |     |  | Patient Refused                           |  | 380 |  |
| Cost Effective Alternative            |  | 105 |  | Prescriber Consultation                                                                                                                                                                                                                                                                                                                                                                      |  | 205 |  | Initiated Cost Effective Drug             |  | 305 |  |
|                                       |  |     |  |                                                                                                                                                                                                                                                                                                                                                                                              |  |     |  | Prescriber Refused Recommendation         |  | 375 |  |
|                                       |  |     |  |                                                                                                                                                                                                                                                                                                                                                                                              |  |     |  | 3 Attempts Unable to Reach Prescriber     |  | 378 |  |
| Cost Effective Alternative            |  | 105 |  | Patient Consultation                                                                                                                                                                                                                                                                                                                                                                         |  | 215 |  | Patient Refused                           |  | 380 |  |
| New/Changed Prescription Therapy      |  | 110 |  | Patient Education and Monitoring                                                                                                                                                                                                                                                                                                                                                             |  | 210 |  | Therapy Success (Resolved/Stable)         |  | 310 |  |
| New/Changed OTC Therapy               |  | 117 |  |                                                                                                                                                                                                                                                                                                                                                                                              |  |     |  | Therapy Failure (Unresolved/Worse)        |  | 320 |  |
|                                       |  |     |  |                                                                                                                                                                                                                                                                                                                                                                                              |  |     |  | Patient Refused                           |  | 380 |  |
| <b>DRUG THERAPY PROBLEM DETECTED:</b> |  |     |  | <b>Patient Education:</b>                                                                                                                                                                                                                                                                                                                                                                    |  |     |  | <b>DRUG THERAPY PROBLEM RESOLVED:</b>     |  |     |  |
| <b>INDICATIONS</b>                    |  |     |  | <input type="checkbox"/> Name of Drug<br><input type="checkbox"/> Therapeutic Class<br><input type="checkbox"/> Directions for Use<br><input type="checkbox"/> Side Effects/Warnings<br><input type="checkbox"/> Storage Requirements                                                                                                                                                        |  |     |  | <b>INDICATIONS</b>                        |  |     |  |
| Needs Drug Therapy 120                |  |     |  | Initial consultation date: <u>MM / DD / YYYY</u><br><input type="checkbox"/> Missed Dose Actions<br><input type="checkbox"/> Written Material                                                                                                                                                                                                                                                |  |     |  | Initiated New Therapy 330                 |  |     |  |
| Unnecessary Prescription Therapy 125  |  |     |  | <input type="checkbox"/> Set Monitoring Appointment                                                                                                                                                                                                                                                                                                                                          |  |     |  | Discontinued Therapy 335                  |  |     |  |
| <b>EFFICACY</b>                       |  |     |  | <b>Monitoring:</b>                                                                                                                                                                                                                                                                                                                                                                           |  |     |  | <b>EFFICACY</b>                           |  |     |  |
| Suboptimal Drug 130                   |  |     |  | Follow-up date: <u>MM / DD / YYYY</u>                                                                                                                                                                                                                                                                                                                                                        |  |     |  | Changed Drug 340                          |  |     |  |
| Dose Too Low 135                      |  |     |  | Is the patient satisfied with the therapy? <input type="checkbox"/> Yes <input type="checkbox"/> No<br>Did the symptoms improve? <input type="checkbox"/> Yes <input type="checkbox"/> No<br>Were any adverse reactions reported? <input type="checkbox"/> Yes <input type="checkbox"/> No<br>Is the patient adherent with therapy? <input type="checkbox"/> Yes <input type="checkbox"/> No |  |     |  | Increased Dose 345                        |  |     |  |
| <b>SAFETY</b>                         |  |     |  |                                                                                                                                                                                                                                                                                                                                                                                              |  |     |  | <b>SAFETY</b>                             |  |     |  |
| Adverse Drug Reaction 140             |  |     |  |                                                                                                                                                                                                                                                                                                                                                                                              |  |     |  | Decreased Dose 355                        |  |     |  |
| Drug Interaction 145                  |  |     |  |                                                                                                                                                                                                                                                                                                                                                                                              |  |     |  | Prescriber Refused Recommendation 375     |  |     |  |
| Dose Too High 150                     |  |     |  |                                                                                                                                                                                                                                                                                                                                                                                              |  |     |  | 3 Attempts Unable to Reach Prescriber 378 |  |     |  |
| <b>ADHERENCE</b>                      |  |     |  |                                                                                                                                                                                                                                                                                                                                                                                              |  |     |  | <b>ADHERENCE</b>                          |  |     |  |
| Overuse of Medication 155             |  |     |  |                                                                                                                                                                                                                                                                                                                                                                                              |  |     |  | Altered Adherence 360                     |  |     |  |
| Underuse of Medication 160            |  |     |  |                                                                                                                                                                                                                                                                                                                                                                                              |  |     |  | Altered Administration or Technique 365   |  |     |  |
| Inappropriate Admin/Technique 165     |  |     |  |                                                                                                                                                                                                                                                                                                                                                                                              |  |     |  | Patient Refused 380                       |  |     |  |
|                                       |  |     |  |                                                                                                                                                                                                                                                                                                                                                                                              |  |     |  | 3 Attempts Unable to Reach Patient 379    |  |     |  |

| IV. Severity Level                                           |                                                                          |                                                                         |
|--------------------------------------------------------------|--------------------------------------------------------------------------|-------------------------------------------------------------------------|
| <input type="checkbox"/> Level 1 Adherence Support           | <input type="checkbox"/> Level 4 Prevented Additional Prescription Order | <input type="checkbox"/> Level 7 Prevented a Life Threatening Situation |
| <input type="checkbox"/> Level 2 Reduced Drug Costs          | <input type="checkbox"/> Level 5 Prevented Emergency Room Visit          |                                                                         |
| <input type="checkbox"/> Level 3 Prevented a Physician Visit | <input type="checkbox"/> Level 6 Prevented Hospital Admission            |                                                                         |

| V. Severity Level Rationale & Additional Notes |
|------------------------------------------------|
|------------------------------------------------|

| Pharmacist Name | NCPDP/NABP | RPh Initials |
|-----------------|------------|--------------|
|                 |            |              |
