# Supplementary material for: A Study to Identify Medication-Related Problems and Associated Cost Avoidance by Community Pharmacists during a Comprehensive Medication Review in Patients One Week Post Hospitalization
Source: MDPI journal article supplement (doi:10.3390/pharmacy7020051), 2019-05-29
Supplement: s1 [file s1]

## Modified CMR Worksheet

Patient Name: \_\_\_\_\_ DOB: \_\_\_\_\_

Address: \_\_\_\_\_

Is the patient cognitively impaired? Yes / No

Is the CMR with the patient? Yes / No Phone #: \_\_\_\_\_

Assistance by (name): \_\_\_\_\_ Relationship: \_\_\_\_\_

Did the patient receive a medication reconciliation before discharge? Yes / No

By whom: ☐ Pharmacist ☐ Physician ☐ Nurse ☐ Other: \_\_\_\_\_

Date of discharge: \_\_\_\_\_

Hospital diagnosis: \_\_\_\_\_

Date of CMR: \_\_\_\_\_

Med List & MAP mailed: \_\_\_\_\_

Follow-up completed: \_\_\_\_\_

Pharmacist: \_\_\_\_\_

Location: ☐ In store ☐ At home ☐ By phone

Patient's pharmacy: \_\_\_\_\_

### Medication Profile

#### ① Medical conditions

- |                                                       |                                               |                                                      |
|-------------------------------------------------------|-----------------------------------------------|------------------------------------------------------|
| <input type="checkbox"/> Alzheimer's                  | <input type="checkbox"/> Depression           | <input type="checkbox"/> Osteoarthritis              |
| <input type="checkbox"/> Anemia                       | <input type="checkbox"/> Diabetes             | <input type="checkbox"/> Osteoporosis                |
| <input type="checkbox"/> Anticoagulation              | <input type="checkbox"/> Dyslipidemia         | <input type="checkbox"/> Parkinson's Disease         |
| <input type="checkbox"/> Asthma                       | <input type="checkbox"/> GI/Reflux/Ulcer      | <input type="checkbox"/> Rheumatoid Arthritis        |
| <input type="checkbox"/> Autoimmune Disorders         | <input type="checkbox"/> Hepatitis C          | <input type="checkbox"/> Schizophrenia               |
| <input type="checkbox"/> Benign Prostatic Hyperplasia | <input type="checkbox"/> HIV/AIDS             | <input type="checkbox"/> Severe Hematologic Disorder |
| <input type="checkbox"/> Bipolar Disorder             | <input type="checkbox"/> Hypertension         | <input type="checkbox"/> Stroke                      |
|                                                       | <input type="checkbox"/> Multiple Sclerosis   | <input type="checkbox"/> Surgery _____               |
|                                                       | <input type="checkbox"/> Neurologic Disorders |                                                      |

#### ② Drug Allergies or Intolerances

- ☐ No known drug allergies

| Medication | Reaction |
|------------|----------|
|            |          |
|            |          |
|            |          |
|            |          |
|            |          |
|            |          |

**3 Physicians and Hospitalists (name, phone number, type of physician)**

|  |  |
|--|--|
|  |  |
|  |  |

|  |  |
|--|--|
|  |  |
|  |  |

**APPENDIX A. Modified CMR Worksheet**

|  |  |  |  |  |  |  |  |  |  |
|--|--|--|--|--|--|--|--|--|--|
|  |  |  |  |  |  |  |  |  |  |
|  |  |  |  |  |  |  |  |  |  |
|  |  |  |  |  |  |  |  |  |  |
|  |  |  |  |  |  |  |  |  |  |
|  |  |  |  |  |  |  |  |  |  |
|  |  |  |  |  |  |  |  |  |  |
|  |  |  |  |  |  |  |  |  |  |
|  |  |  |  |  |  |  |  |  |  |
|  |  |  |  |  |  |  |  |  |  |
|  |  |  |  |  |  |  |  |  |  |

**Pharmacist’s Notes:**

## APPENDIX A. Modified CMR Worksheet

## 5 Detailed Medication Action Plan for Pharmacists

[illegible]

**APPENDIX A. Modified CMR Worksheet**

**Medication Action Plan**

Patient Name: \_\_\_\_\_

Pharmacist Name: \_\_\_\_\_

Date of visit with pharmacist: \_\_\_\_\_

Pharmacist's Phone Number: \_\_\_\_\_

| Medication | Description of the problem | What I should do |
|------------|----------------------------|------------------|
|            |                            |                  |
|            |                            |                  |
|            |                            |                  |
|            |                            |                  |
|            |                            |                  |
|            |                            |                  |
|            |                            |                  |
|            |                            |                  |
|            |                            |                  |
|            |                            |                  |

**Please feel free to call if you have any questions or concerns!**
